# Supplementary material
Source: PubMed Central journal article supplement (PMC7475040)
Supplement: msaa117_supplementary_data.pdf [file msaa117_supplementary_data.pdf]

**Supplementary material Tables**

**Table S1. Primers used in this study.**

| virus | Primer  | Nucleotide information         |
|-------|---------|--------------------------------|
| PDCoV | PDCoV-F | 5'-TCCTCCAAGGAGGCTATGC-3'      |
|       | PDCoV-R | 5'-GCGAATTCTGGATCGTTGT-3'      |
| PEDV  | PEDV-F  | 5'-CCCACCAACTTTAGTATGAGT-3'    |
|       | PEDV-R  | 5'-GTACCATGACACCAGAGTAAT-3'    |
| PTV   | PTV-F   | 5'-GGCGACAGGGTACAGAAGAG-3'     |
|       | PTV-R   | 5'-GGCCAGCCGCGACCCTGTC-3'      |
| PKV   | PKV-F   | 5'-TGTGCCTTCCGCATTGTT-3'       |
|       | PKV-R   | 5'-TGTACCTGTTCGTA AAACT-3'     |
| TGEV  | TGEV-F  | 5'-ACTCGCTATCGCATGGTGAA-3'     |
|       | TGEV-R  | 5'-GATGGACGAGCATAGGCATT-3'     |
| PRRSV | PRRSV-F | 5'-GCCTCGTGTTGGGTGGCAGAA-3'    |
|       | PRRSV-R | 5'-CGCCCTAATTGAATAGGTGACTT-3'  |
| PRV   | PRV-F   | 5'-CACGGAGGACGAGCTGGGGCT-3'    |
|       | PRV-R   | 5'-GTCCACGCCCCGCTTGAAGCT-3'    |
| PCV2  | PCV2-F  | 5'-AGAAGCTCTCTATCGGAG-3'       |
|       | PCV2-R  | 5'-AAGGTTGAATTCTGGCCC-3'       |
| CSFV  | CSFV-F  | 5'-TAGGGTGGACGGGTGTCATAGAGT-3' |
|       | CSFV-R  | 5'-AAGCATATATTGCTGGAAGTAGCT-3' |

**Table S2. PDCoV sequences information.**

|        | GenBank accession | Strains    | Hosts | Country          | Collection Date |
|--------|-------------------|------------|-------|------------------|-----------------|
| Genome | MN520193*         | AH2018-81  | pig   | China: Anhui     | 2018            |
|        | MN520199*         | AH2018-93  | pig   | China: Anhui     | 2018            |
|        | MN520200*         | AH2018-94  | pig   | China: Anhui     | 2018            |
|        | MN520190*         | AH2018-322 | pig   | China: Anhui     | 2018-03         |
|        | MN520198*         | AH2019-H   | pig   | China: Anhui     | 2019            |
|        | MN520202*         | GD2018-1   | pig   | China: Guangdong | 2018-05         |
|        | MN520201*         | GD2018-186 | pig   | China: Guangdong | 2018            |
|        | MN520203*         | GX2018-1   | pig   | China: Guangxi   | 2018-11         |
|        | MN520204*         | HN2018-LH2 | pig   | China: Henan     | 2018-05         |

|           |                    |         |                        |            |
|-----------|--------------------|---------|------------------------|------------|
| MN520205* | HN2019-C115        | pig     | China: Henan           | 2019-03    |
| MN520206* | HN2019-C132        | pig     | China: Henan           | 2019-03    |
| MN520197* | SD2018-4           | pig     | China: Shandong        | 2018-04    |
| MN520194* | SD2018-10          | pig     | China: Shandong        | 2018-10    |
| MN200481* | SD2018-300         | pig     | China: Shandong        | 2018-03    |
| MN520195* | SD2018-304         | pig     | China: Shandong        | 2018-03    |
| MN520196* | SD2018-306         | pig     | China: Shandong        | 2018-03    |
| MN520191* | SD2019-426         | pig     | China: Shandong        | 2019       |
| MN520207* | JS2018-QF49        | pig     | China: Jiangsu         | 2018-10    |
| MN520208* | JS2018-YC15        | pig     | China: Jiangsu         | 2018-07    |
| MN520209* | JS2019-A1414       | pig     | China: Jiangsu         | 2019-01    |
| MN520192* | ZJ2018-D           | pig     | China: Zhejiang        | 2018-08    |
| NC_039208 | HKU15-155          | pig     | China: Hong Kong       | 2010       |
| MH708124  | HNZK-04            | pig     | China                  | 2018-03-20 |
| MH708123  | HNZK-02            | pig     | China                  | 2018-03-20 |
| MH708125  | HNZK-06            | pig     | China                  | 2018-03-20 |
| KR131621  | PDCoV/CHJXNI2/2015 | pig     | China                  | 2015-03    |
| KY293677  | CH/JXJGS01/2016    | pig     | China                  | 2016-05-23 |
| KY293678  | CH/JXJGS02/2016    | pig     | China                  | 2016-05-23 |
| KJ769231  | OhioCVM1/2014      | pig     | USA                    | 2014-03-01 |
| JQ065042  | HKU15-44           | pig     | China: Hong Kong       | 2009       |
| MF948005  | HB-BD              | pig     | China                  | 2017-08-10 |
| KJ567050  | 8734/USA-IA/2014   | pig     | USA: Iowa              | 2014-02-20 |
| KJ462462  | OH1987             | pig     | USA: Ohio              | 2014-01-31 |
| KJ569769  | IN2847             | pig     | USA: Ohio              | 2014-02-13 |
| KJ584355  | IL2768             | pig     | USA: Ohio              | 2014-02-12 |
| KJ584356  | SD3424             | pig     | USA: South: Dakota     | 2014-02-20 |
| KJ584357  | KY4813             | pig     | USA: Kentucky          | 2014-03-07 |
| KJ584358  | PA3148             | pig     | USA: Pennsylvania      | 2014-02-18 |
| KJ584359  | NE3579             | pig     | USA: Nebraska          | 2014-02-21 |
| KJ620016  | MI6148             | pig     | USA: Michigan          | 2014-03-18 |
| KM820765  | KNU14-04           | pig     | South Korea            | 2014-04    |
| KP981395  | USA/IL/2014/026P   | unknown | USA: Illinois          | 2014       |
| KT381613  | DV_P11             |         |                        |            |
| KT381613  | OH11846            | pig     | USA: Ohio              | 2014-05-07 |
| KY354363  | DH1                | pig     | South Korea: Kyunggido | 2016-04-01 |
| KY354364  | DH2                | pig     | South Korea: Kyunggido | 2016-04-01 |
| KY364365  | KNU16-07           | pig     | South Korea            | 2014-07    |
| LC216914  | S579N              | pig     | China: Hong Kong       | 2014-02-13 |

---

|          |                                     |     |                  |            |
|----------|-------------------------------------|-----|------------------|------------|
| KY513725 | CH/Jiangsu/2014                     | pig | China: Jiangsu   | 2014       |
| KP757890 | CHN-AH-2004                         | pig | China            | 2004-05-24 |
| KP757891 | CHN-HB-2014                         | pig | China            | 2014-12-26 |
| KP757892 | CHN-JS-2014                         | pig | China            | 2014-12-20 |
| KT336560 | CHN-HN-2014                         | pig | China            | 2014-11-24 |
| KU981059 | NH                                  | pig | China            | 2015-02-16 |
| MF431742 | GD                                  | pig | China            | 2015       |
| MF642322 | CHN/GS/2016/1                       | pig | China            | 2016-08    |
| MF642323 | CHN/GS/2016/2                       | pig | China            | 2016-08    |
| MF642324 | CHN/GS/2017/1                       | pig | China            | 2017-04    |
| MF642325 | CHN/QH/2017/1                       | pig | China            | 2017-03    |
| KT021234 | CH/SXD1/2015                        | pig | China            | 2015-03-20 |
| KY926512 | KNU16-11                            | pig | South Korea      | 2016-11    |
| MG832584 | CHN-HN-1601                         | pig | China            | 2016-07    |
| MH715491 | PDCoV/CHGD/2016                     | pig | China            | 2016       |
| MF431743 | SD                                  | pig | China            | 2014       |
| MF041982 | SHJS/SL/2016                        | pig | China            | 2016-12-23 |
| MG242062 | CHN-HeB1-2017                       | pig | China            | 2017       |
| KY065120 | CHN/Tianjin/2016                    | pig | China: Tianjin   | 2016       |
| KY513724 | CH/Hunan/2014                       | pig | China: Hunan     | 2014       |
| KM012168 | Michigan/8977/2014                  | pig | USA: Michigan    | 2014-03-17 |
| KJ601777 | PDCoV/USA/Illinois133/2014_from_USA | pig | USA: Illinois    | 2014-01-08 |
| KJ481931 | PDCoV/USA/Illinois121/2014_from_USA | pig | USA              | 2014-01-04 |
| KX834351 | PDCoV/Swine/Vietnam/HaNoi6/2015     | pig | Viet Nam         | 2015-10-10 |
| KX834352 | PDCoV/Swine/Vietnam/Binh21/2015     | pig | Viet Nam         | 2015-12-08 |
| LC216915 | S582N                               | pig | China: Hong Kong | 2014-02-13 |
| KU051641 | PDCoV/Swine/Thailand/S5011/2015     | pig | Thailand         | 2015-06-10 |
| KU051649 | PDCoV/Swine/Thailand/S5015L/2015    | pig | Thailand         | 2015-06-30 |
| KX118627 | P1_16_BTL_0115/PDCoV/2016/Lao       | pig | Laos             | 2016-01-20 |
| KJ601778 | PDCoV/USA/Illinois134/2014_from_USA | pig | USA: Illinois    | 2014-01-08 |

---

---

|          |                                     |         |                |            |
|----------|-------------------------------------|---------|----------------|------------|
| KJ601779 | PDCoV/USA/Illinois136/2014_from_USA | pig     | USA: Illinois  | 2014-01-11 |
| KJ601780 | PDCoV/USA/Ohio137/2014_from_USA     | pig     | USA: Ohio      | 2014-01-26 |
| KT266822 | CH/Sichuan/S27/2012                 | pig     | China: Sichuan | 2012       |
| KR265861 | USA/Nebraska210/2014                | pig     | USA: Nebraska  | 2014-02-05 |
| KX443143 | CH-01                               | unknown | China          | 2016       |
| KU984334 | TT_1115                             | pig     | Thailand       | 2015-11    |
| KY363868 | CHN-GD16-05                         | pig     | China          | 2016-01-05 |
| MF280390 | CHN-GD-2016                         | pig     | China          | 2016       |
| KR265859 | USA/Minnesota159/2014               | pig     | USA: Minnesota | 2014-02-11 |
| KR265856 | USA/Illinois272/2014                | pig     | USA: Illinois  | 2014-02-23 |
| MF095123 | CHN-HG-2017                         | pig     | China          | 2017-02-15 |
| KR150443 | USA/Arkansas61/2015                 | pig     | USA: Arkansas  | 2015-03-24 |
| KR265848 | USA/Minnesota214/2014               | pig     | USA: Minnesota | 2014-03-14 |
| KR265860 | USA/Nebraska209/2014                | pig     | USA: Nebraska  | 2014-02-05 |
| KY363867 | CHN-GD16-03                         | pig     | China          | 2016-03-18 |
| KR265864 | USA/Minnesota292/2014               | pig     | USA: Minnesota | 2014-03-14 |
| KR265847 | USA/Minnesota442/2014               | pig     | USA: Minnesota | 2014-03-06 |
| KR265850 | USA/Michigan448/2014                | pig     | USA: Michigan  | 2014-04-02 |
| KR265851 | USA/Indiana453/2014                 | pig     | USA: Indiana   | 2014-05-13 |
| KR265852 | USA/Illinois449/2014                | pig     | USA: Illinois  | 2014-04-21 |
| KR265853 | USA/Minnesota/2013                  | pig     | USA: Minnesota | 2013-10-14 |
| KR265854 | USA/Minnesota454/2014               | pig     | USA: Minnesota | 2014-05-21 |
| KR265855 | USA/Minnesota455/2014               | pig     | USA: Minnesota | 2014-05-21 |

---

|          |                             |         |                      |            |
|----------|-----------------------------|---------|----------------------|------------|
| KR265857 | USA/Illinois273/2014        | pig     | USA: Illinois        | 2014-02-23 |
| KR265858 | USA/NorthCarolina452/2014   | pig     | USA: North: Carolina | 2014-05-06 |
| KR265862 | USA/Ohio444/2014            | pig     | USA: Ohio            | 2014-03-26 |
| KR265863 | USA/Ohio445/2014            | pig     | USA: Ohio            | 2014-03-27 |
| KR265865 | USA/Iowa459/2014            | pig     | USA: Iowa            | 2014-06-05 |
| KX022603 | PDCoV/USA/Minnesota140/2015 | pig     | USA: Minnesota       | 2015-12-18 |
| KR265849 | USA/Michigan447/2014        | pig     | USA: Michigan        | 2014-04-02 |
| KX022602 | PDCoV/USA/Iowa136/2015      | pig     | USA: Iowa            | 2015-10-15 |
| KX022604 | PDCoV/USA/Nebraska137/2015  | pig     | USA: Nebraska        | 2015-11-27 |
| KU665558 | CHN-LYG-2014                | unknown | China                | 2014-06-26 |
| LC260038 | AKT/JPN/2014                | pig     | Japan: Akita         | 2014-05    |
| LC260039 | GNM-1/JPN/2014              | pig     | Japan: Gunma         | 2014-05    |
| LC260040 | GNM-2/JPN/2014              | pig     | Japan: Gunma         | 2014-05    |
| LC260041 | IWT/JPN/2014                | pig     | Japan: Iwate         | 2014-05    |
| LC260042 | MYZ/JPN/2014                | pig     | Japan: Miyazaki      | 2014-03    |
| LC260043 | OKN/JPN/2014                | pig     | Japan: Okinawa       | 2014-08    |
| LC260044 | YMG/JPN/2014                | pig     | Japan: Yamagata      | 2014-12    |
| LC260045 | HKD/JPN/2016                | pig     | Japan: Hokkaido      | 2016-09    |
| KX022605 | PDCoV/USA/Nebraska145/2015  | pig     | USA: Nebraska        | 2015-12-21 |

※: Newly sequenced strains in this study.

**Table S3. Sequence identity between this study and reference sequences.**

| Isolated strains | Sequence homology among isolated strains | Sequence homology between isolated strains and reference strain |
|------------------|------------------------------------------|-----------------------------------------------------------------|
| S gene (nt)      | 96.1%-100%                               | 95.6%-99.9%                                                     |
| S gene (aa)      | 96.7%-100%                               | 95.6%-100%                                                      |
| Full-length      | 98.9%-99.8%                              | 91.2%-99.9%                                                     |

**Table S4. Positively selected amino acid polymorphisms among different lineages.**

| site | Lineage     |          |       |     |
|------|-------------|----------|-------|-----|
|      | Early China | Thailand | China | USA |
| 107  | Q           | Q/L      | Q/L   | L   |

|     |   |       |         |       |
|-----|---|-------|---------|-------|
| 149 | D | A/N/R | H/Y/R/Q | H/Y   |
| 183 | T | T     | T/I     | T/I   |
| 630 | A | A     | A/L/V/T | A/V/T |
| 698 | S | S     | S/A/T   | S     |

### Supplementary material Figures

**Fig S1. Identification of PDCoV strains SD2018 and AH2019/H in LLC-PK1 cells.** A) LLC-PK1 cells were infected with virus isolates from pigs and subsequently tested by rtPCR or PCR for various porcine viruses including Porcine Epidemic Diarrhea (PEDV), Porcine Kobuvirus (PKV), Porcine teschovirus (PTV), Porcine Transmissible Gastroenteritis Virus (TGEV), Classical Swine Fever Virus (CSFV), Porcine reproductive and respiratory syndrome virus (PRRSV), and Pseudorabies virus (PRV). B) Detection of the two PDCoV strains in LLC-PK1 cells by indirect immunofluorescence assay (IFA) at 18 hpi at 0.1 MOI. A monoclonal antibody (MAb) for PDCoV N protein and fluorescein isothiocyanate (FITC)-conjugated goat anti-mouse immunoglobulin G (IgG) were used as primary and secondary antibodies, followed by staining with 4,6-diamidino-2-phenylindole (DAPI). Magnification: 200x.

**Fig S2. ML tree based on non-recombination complete genomes.** The ML tree was reconstructed using RAxML (v8.4.10) using the general time-reversible substitution model with gamma-distributed rates across sites. 1,000 bootstraps were evaluated to assess support values. The Thailand lineage is represented in blue, the Early China lineage in red, the USA lineage in orange, and the China lineage in green.

**Fig S3.** A) ML phylogenetic trees inferred for 194 PDCoV S gene under the general time-reversible substitution model with gamma-distributed rates across sites. 1,000 bootstraps were evaluated to assess support values. B) Temporal signal testing based on an ML tree using TempEst (version 1.5.3). C) tMRCA and evolutionary rate of PDCoV. The tMRCA and evolutionary rate of PDCoV as well as each lineage separately were estimated using BEAST (version 1.10.5).

**Fig S4. Location of selected amino acids in the structure of S.** Surface representation of the

tip of a S monomer. The amino acids under selection are shown as red spheres. Note that His 149 and Ser 98 are exposed at the surface of the molecule.

**Fig S5. Linear regression between patristic and geographic distances between sampling locations considered in the discrete phylogeographic inference.** Patristic distances were computed on the MCC tree obtained from the discrete phylogeographic analysis performed with the generalized linear model (GLM) extension.

**Fig S6. Comparison between the continuous phylogeographic reconstructions obtained under the relaxed random walk (RRW) and the directional random walk (RDW) models.** The plots show the mapped MCC tree and 95% HPD regions based on trees subsampled from the post burn-in posterior distribution of trees. The tree nodes are colored according to a color scale ranging from brown (the time to the most recent common ancestor, TMRCA) to green (most recent sampling time). 95% HPD regions were computed for successive time layers and superimposed using the same color scale reflecting time. On the maps, subnational Chinese province borders are represented by white lines.

**A**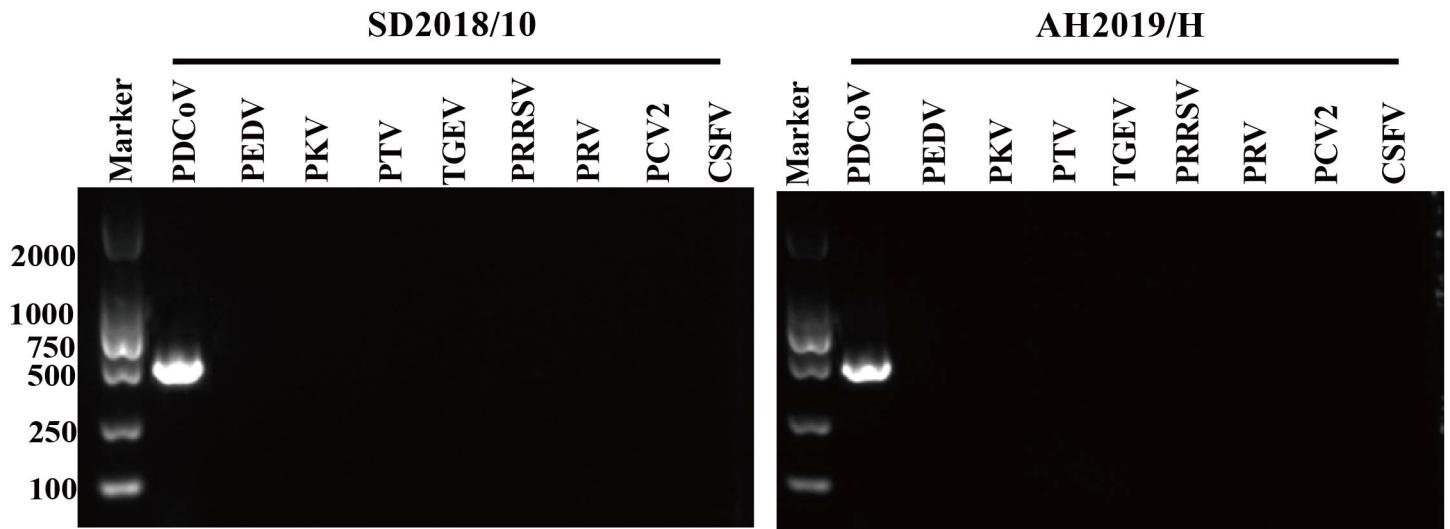**B**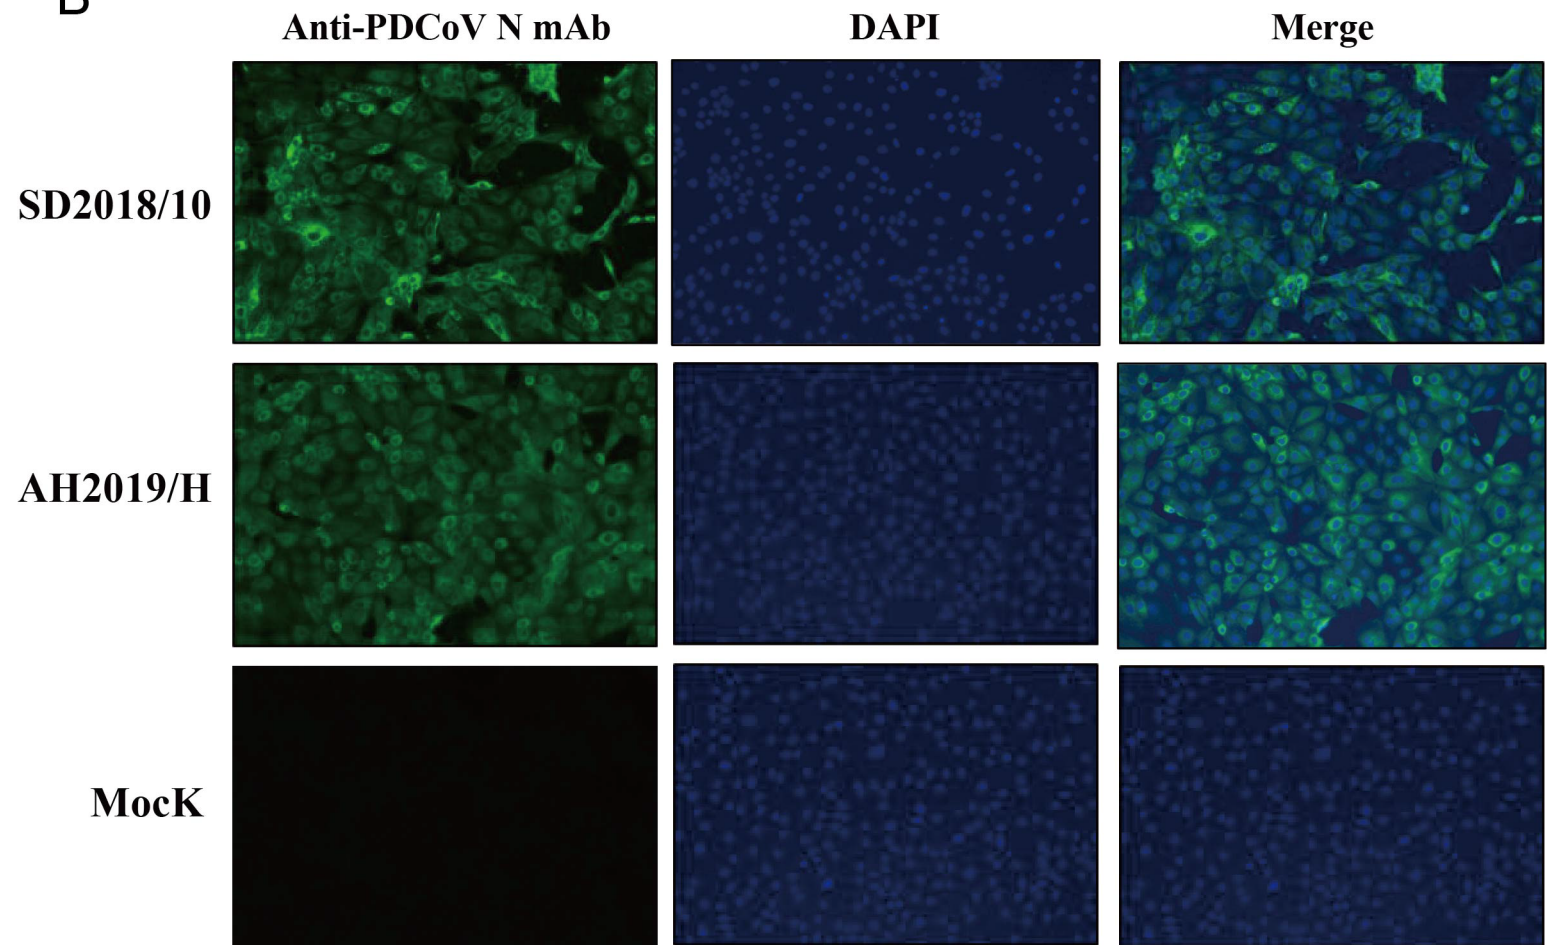

Figure S1



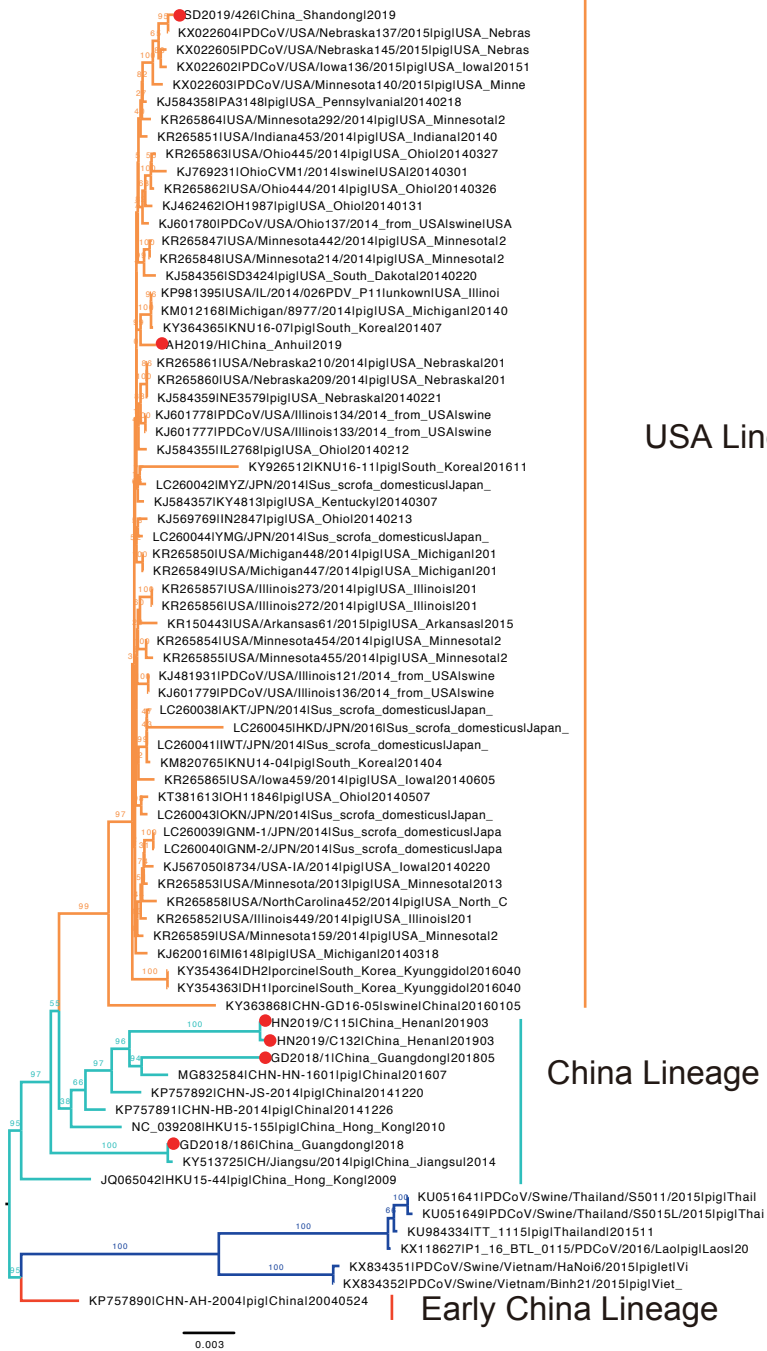

### USA Lineage

### China Lineage

### Thailand Lineage

### Early China Lineage

Figure S2

A

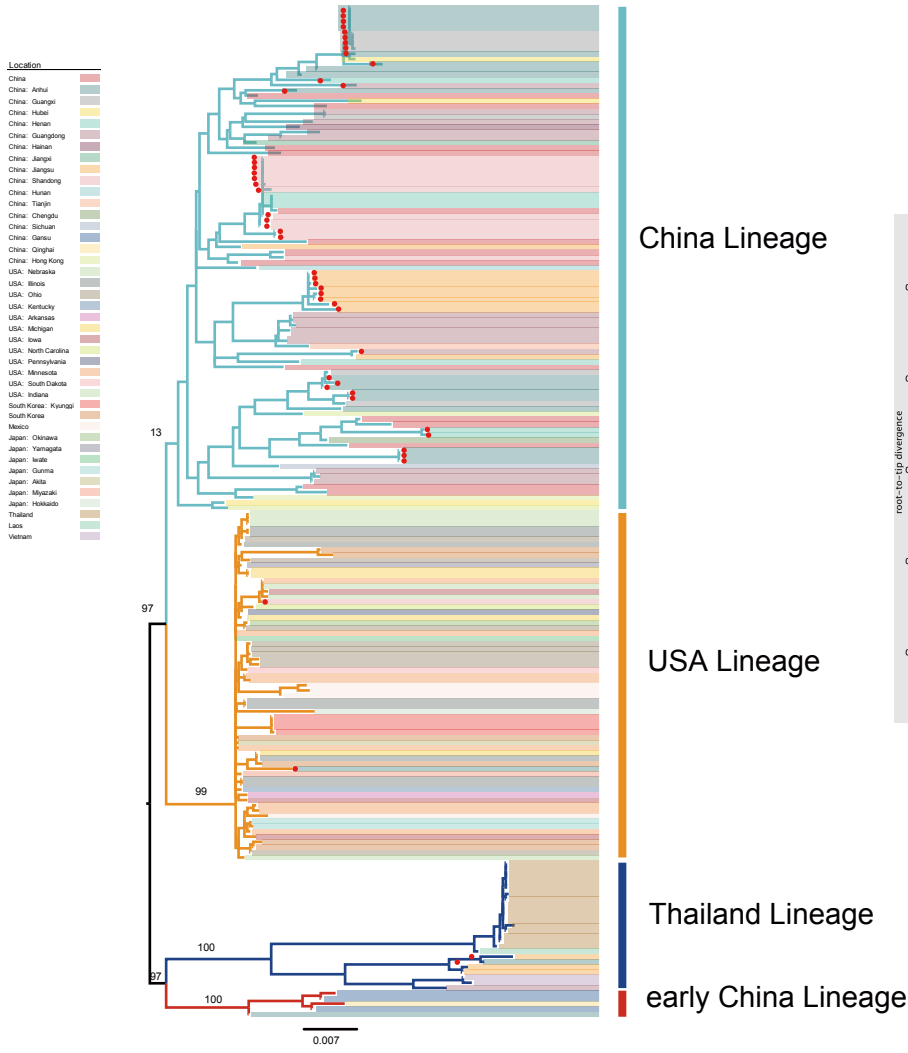

B

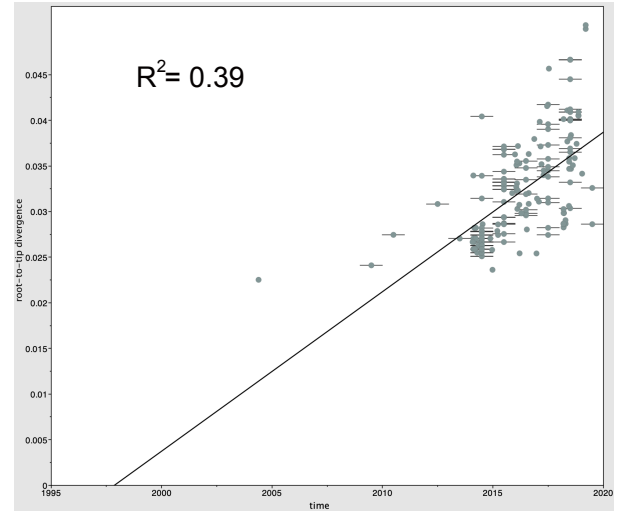

C

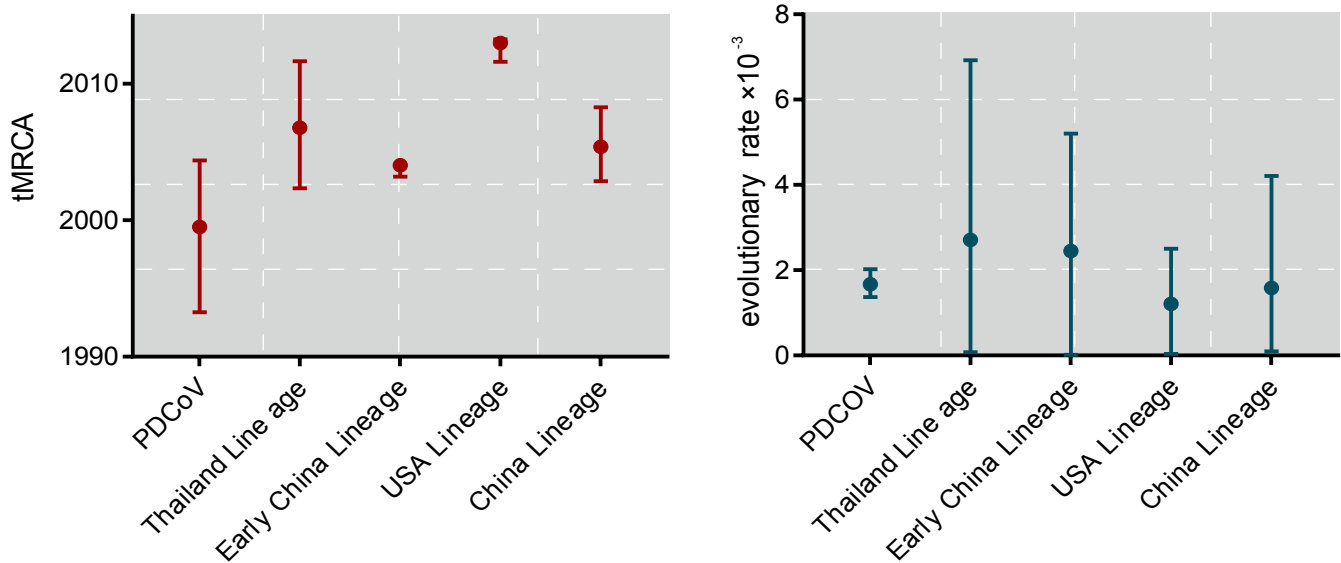

Figure S3

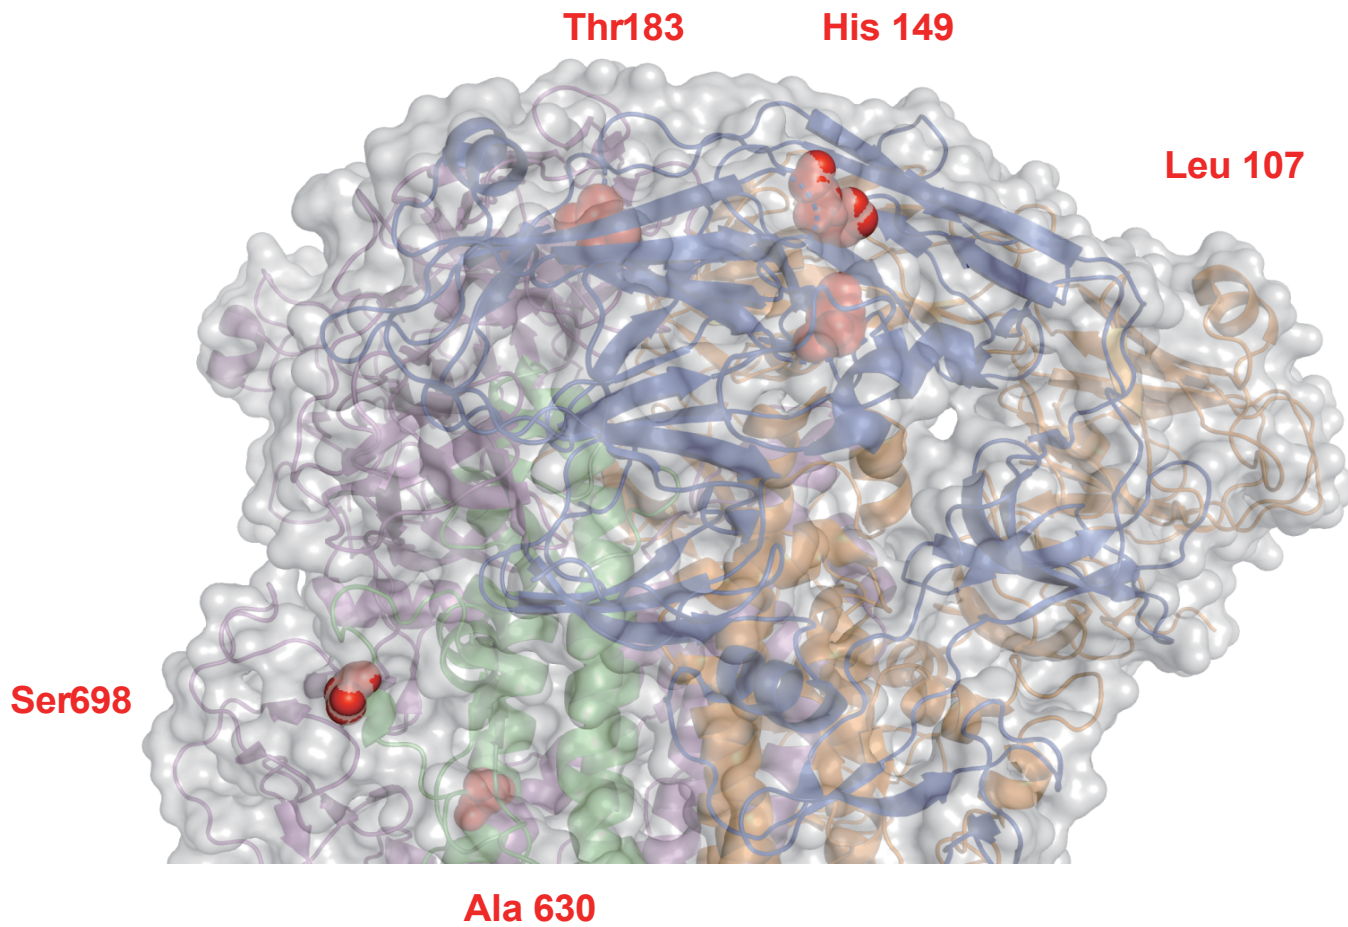

Figure S4

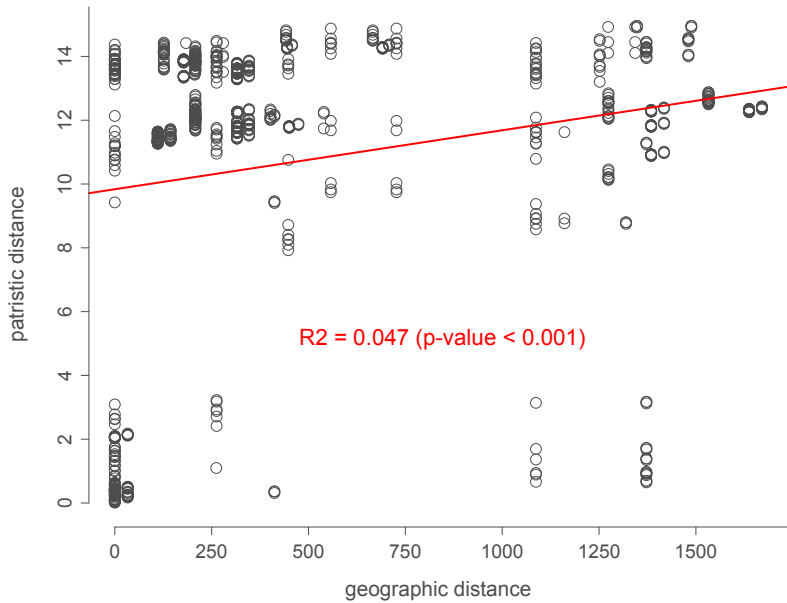

Figure S5

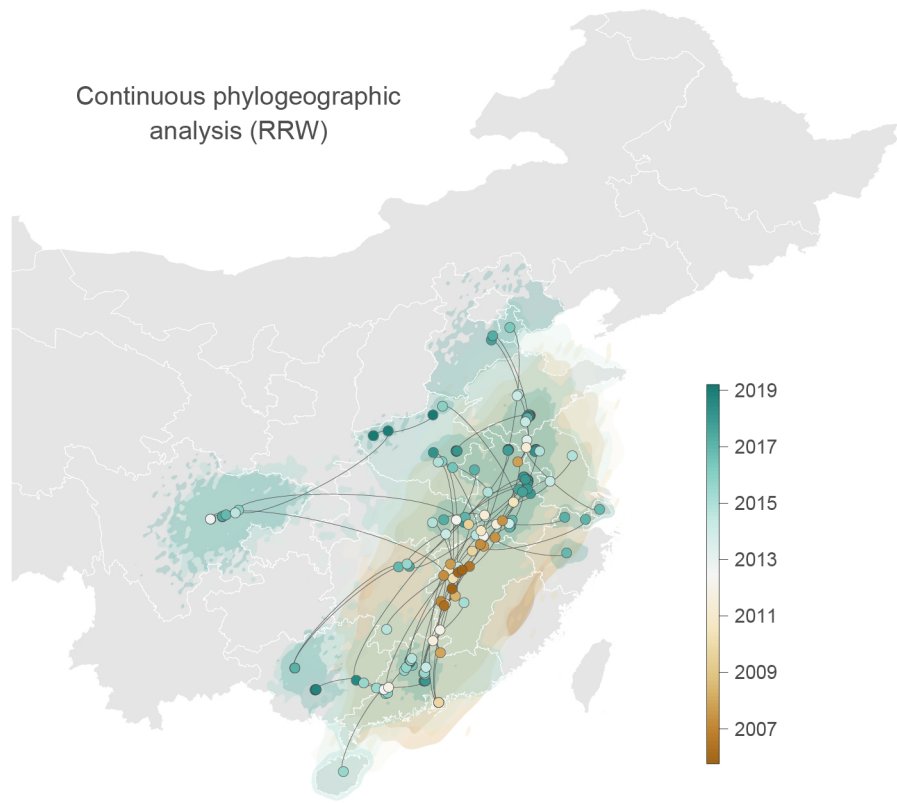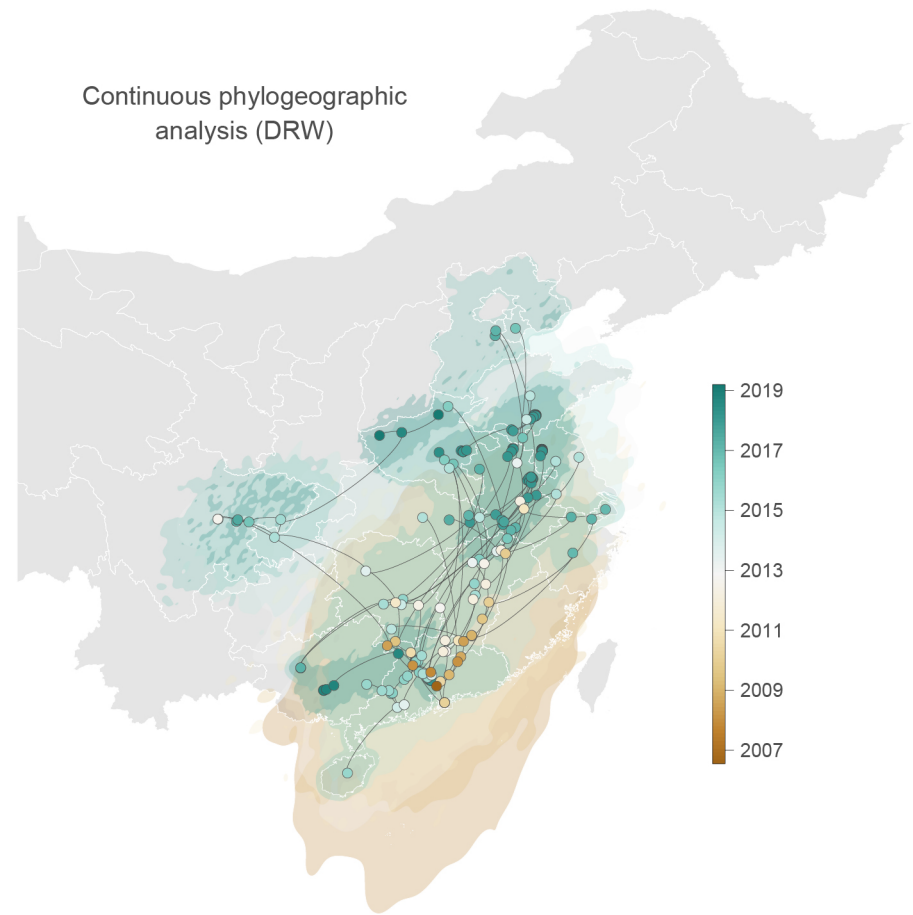

Figure S6
